# Supplementary material for: Utilizing pre-operative quantitative radiological imaging to predict surgical outcomes following untethering for adult tethered cord syndrome
Source: Research Square preprint supplement (doi:10.21203/rs.3.rs-7027483/v1), 2025-09-22
Supplement: Supplementary file 1 [file cb9432df28c6a67ce8db077d.docx]

**Supplementary Table 1. Japanese Orthopaedic Association (JOA) scoring system for assessment of the results of treatment for low back pain.**

|  |  | **Points** |
| --- | --- | --- |
| **Subjective symptoms (0-9 points)** | | |
| **Low back pain** | None | 3 |
|  | Occasional mild pain | 2 |
|  | Continuous mild or occasional severe pain | 1 |
|  | Continuous severe pain | 0 |
| **Leg pain or tingling** | None | 3 |
|  | Occasional slight symptom | 2 |
|  | Frequent slight or occasional severe pain | 1 |
|  | Frequent or continuous severe pain | 0 |
| **Gait** | Normal | 3 |
|  | Able to walk more than 500m despite leg pain, tingling, or muscle weakness | 2 |
|  | Unable to walk less than 500m because of leg pain, tingling, or muscle weakness | 1 |
|  | Unable to walk less than 100m because of leg pain, tingling, or muscle weakness | 0 |
| **Clinical signs (0-6 points)** | | |
| Straight leg raising test | Normal | 2 |
|  | 30°~70° | 1 |
|  | <30° | 0 |
| Sensory loss | Normal | 2 |
|  | Slight | 1 |
|  | Severe | 0 |
| Motor loss | Normal | 2 |
|  | Slight (MMT=4) | 1 |
|  | Severe (MMT<3) | 0 |
| **Restriction of activities of daily living (0-14 points)** | | |
| Turning over while lying |  |  |
| Standing |  |  |
| Washing face | Normal | 2 |
| Leaning forward | Moderate restriction | 1 |
| Sitting | Severe restriction | 0 |
| Holding heavy object |  |  |
| Walking |  |  |
| **Urinary bladder function**  **(-6 to 0 points)** | Normal | 0 |
|  | Mild dysuria | -3 |
|  | Severe dysuria | -6 |
